# Supplementary material for: Atomic-scale analysis of the physical strength and phonon transport mechanisms of monolayer β-bismuthene
Source: Royal Society of Chemistry journal article supplement (doi:10.1039/d0cp04785f), 2020-01-01
Supplement: d0cp04785f3.pdf [file d0cp04785f3.pdf]

## Atomic-Scale Analysis of Physical Strength and Phonon Transport Mechanisms of Monolayer $\beta$ -Bismuthene

Emdadul Haque Chowdhury<sup>1</sup>, Md. Habibur Rahman<sup>1</sup>, Pritom Bose<sup>1</sup>, Rahul Jayan<sup>2</sup>, Md Mahbubul Islam<sup>2\*</sup>

<sup>1</sup>Department of Mechanical Engineering, Bangladesh University of Engineering and Technology, Dhaka-1000, Bangladesh

<sup>2</sup>Department of Mechanical Engineering, Wayne State University, Detroit MI – 48202, United States

\*Corresponding Author. E-mail address: mahbub.islam@wayne.edu

### Supporting Information

#### Virial Stress Formulation

The atomic stress in our simulation is calculated using Virial stress theorem which stands as,

$$\sigma_{\text{virial}}(r) = \frac{1}{\Omega} \sum_i (-\dot{m}_i \dot{u}_i \otimes \dot{u}_i + \frac{1}{2} \sum_{j \neq i} r_{ij} \otimes f_{ij})$$

In this theorem, the summation is performed over all the atoms occupying a volume  $\Omega$ ,  $\dot{m}_i$  presents the mass of atom  $i$ ,  $\otimes$  is the cross product,  $\dot{u}_i$  is the time derivative, which indicates the displacement of the atom with respect to a reference position,  $r_{ij}$  represents the position vector of the atom, and  $f_{ij}$  is the interatomic force applied on atom  $i$  by atom  $j$ .

**Table 1.** Parameter for Stillinger Weber (SW) potential for beta bismuthene. Note that only epsilon and sigma have unit and other parameters are unitless.

| Element 1 | Element 2 | Element 3 | $\epsilon$ (eV) | $\sigma$ (Angstrom) | $a$   | $\lambda$ | $\gamma$ | $\cos \theta_o$ | A     | B       | P | Q | tol |
|-----------|-----------|-----------|-----------------|---------------------|-------|-----------|----------|-----------------|-------|---------|---|---|-----|
| Bi        | Bi        | Bi        | 1               | 0.552               | 6.690 | 10.574    | 1        | -0.016          | 6.805 | 462.978 | 4 | 0 | 0.0 |

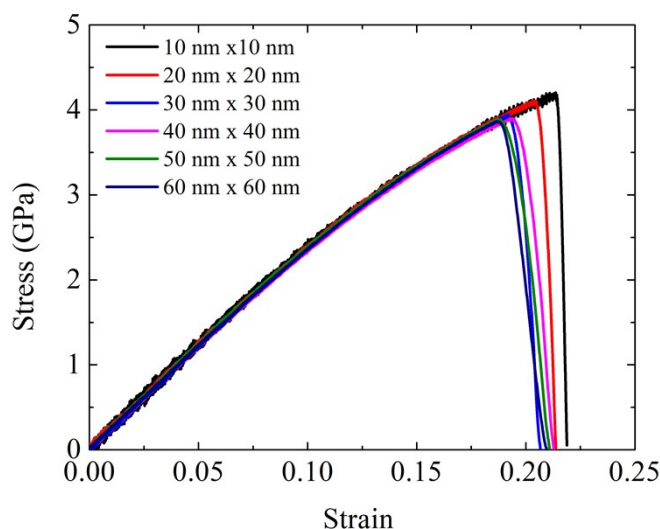

**FIGURE S1.** Demonstration of tensile properties of beta bismuthene along with armchair direction considering different system size at 300K at a strain rate of  $10^9$  ( $s^{-1}$ )

To check the convergence of the mechanical properties with system size, we carried our tensile simulation of beta bismuthene at 300K considering 6 different system sizes, such as 10 nm x 10 nm, 20 nm x 20 nm, 30 nm x 30 nm, 40 nm x 40 nm, 50 nm x 50 nm, and 60 nm x 60 nm using a strain rate of  $10^9$  ( $s^{-1}$ ). It is quite evident from Fig.S1 that any simulation cell sizes larger than 20 nm x 20 nm has negligible influence on the tensile properties such as UTS, fracture strain and, YM; hence we have reported all the tensile properties considering a system size of 40 nm x 40 nm, which allows to perform the study within a reasonable computational time.
